# Supplementary material
Source: PubMed Central journal article supplement (PMC4355184)
Supplement: NIHMS645611-supplement-supplement_1.pdf [file NIHMS645611-supplement-supplement_1.pdf]

**Supplemental Table.** Detailed analysis of all 33 cases. The patients are ordered based on the computer score ranging from -1.13 (atypical UIP) to 1.74 (classic UIP). Coronal and axial views of the lung parenchyma are shown with a window level of -500 HU and a width of 1400 HU.

|                                                                                                                                                                                                                                     |                                                                                                                                                                                                                                     |
|-------------------------------------------------------------------------------------------------------------------------------------------------------------------------------------------------------------------------------------|-------------------------------------------------------------------------------------------------------------------------------------------------------------------------------------------------------------------------------------|
| 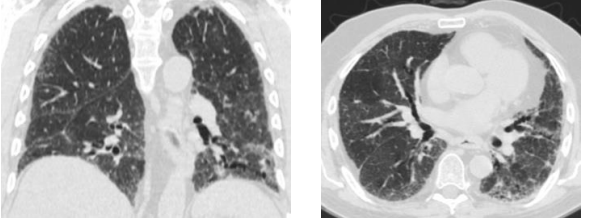 <p>1. Computer score: -1.13 (atypical UIP) ✗</p> <p>consensus: classic UIP</p> <p>fellow 1: atypical UIP ✗</p> <p>fellow 2: atypical UIP ✗</p>    |  <p>2. Computer score: -1.03 (atypical UIP) ✓</p> <p>consensus: atypical UIP</p> <p>fellow 1: atypical UIP ✓</p> <p>fellow 2: atypical UIP ✓</p>  |
|  <p>3. Computer score: -0.97 (atypical UIP) ✓</p> <p>consensus: atypical UIP</p> <p>fellow 1: atypical UIP ✓</p> <p>fellow 2: atypical UIP ✓</p>  |  <p>4. Computer score: -0.89 (atypical UIP) ✓</p> <p>consensus: atypical UIP</p> <p>fellow 1: atypical UIP ✓</p> <p>fellow 2: atypical UIP ✓</p> |
|  <p>5. Computer score: -0.88 (atypical UIP) ✓</p> <p>consensus: atypical UIP</p> <p>fellow 1: atypical UIP ✓</p> <p>fellow 2: atypical UIP ✓</p> |  <p>6. Computer score: -0.82 (atypical UIP) ✗</p> <p>consensus: classic UIP</p> <p>fellow 1: classic UIP ✓</p> <p>fellow 2: classic UIP ✓</p>   |

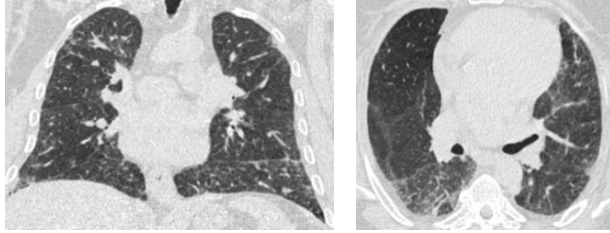

7. Computer score: -0.7 (atypical UIP) ✓

consensus: atypical UIP

fellow 1: atypical UIP ✓

fellow 2: atypical UIP ✓

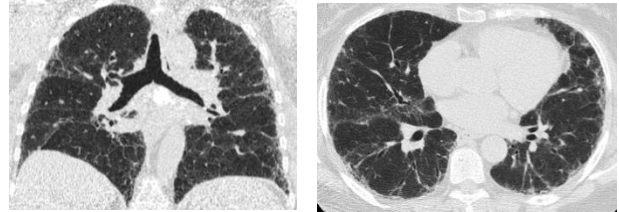

8. Computer score: -0.64 (atypical UIP) ✓

consensus: atypical UIP

fellow 1: atypical UIP ✓

fellow 2: atypical UIP ✓

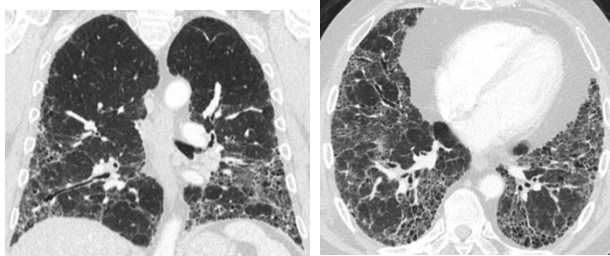

9. Computer score: -0.63 (atypical UIP) ✓

consensus: atypical UIP

fellow 1: classic UIP ✗

fellow 2: classic UIP ✗

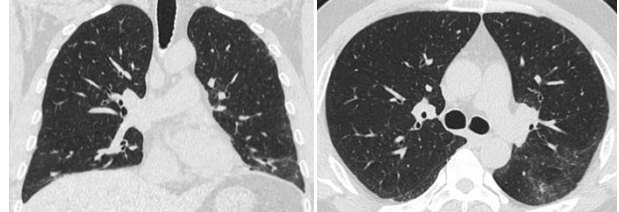

10. Computer score: -0.56 (atypical UIP) ✓

consensus: atypical UIP

fellow 1: atypical UIP ✓

fellow 2: atypical UIP ✓

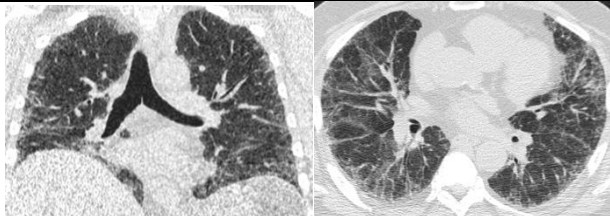

11. Computer score: -0.41 (atypical UIP) ✓

consensus: atypical UIP

fellow 1: atypical UIP ✓

fellow 2: atypical UIP ✓

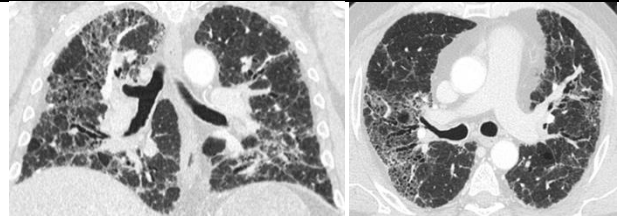

12. Computer score: -0.39 (atypical UIP) ✓

consensus: atypical UIP

fellow 1: atypical UIP ✓

fellow 2: atypical UIP ✓

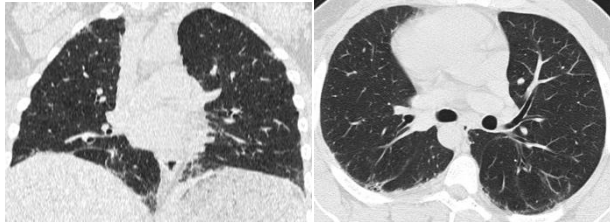

13. Computer score: -0.34 (atypical UIP) ✗

consensus: classic UIP

fellow 1: atypical UIP ✗

fellow 2: atypical UIP ✗

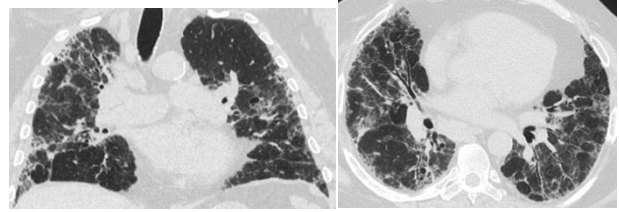

14. Computer score: -0.28 (atypical UIP) ✓

consensus: atypical UIP

fellow 1: atypical UIP ✓

fellow 2: atypical UIP ✓

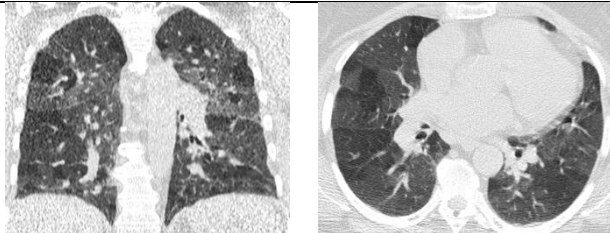

15. Computer score: -0.23 (atypical UIP) ✓

consensus: atypical UIP

fellow 1: atypical UIP ✓

fellow 2: atypical UIP ✓

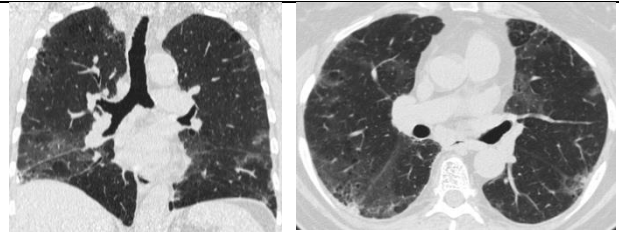

16. Computer score: -0.21 (atypical UIP) ✓

consensus: atypical UIP

fellow 1: atypical UIP ✓

fellow 2: atypical UIP ✓

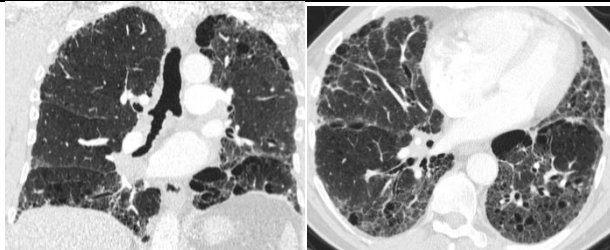

17. Computer score: -0.09 (atypical UIP) ✓

consensus: atypical UIP

fellow 1: classic UIP ✗

fellow 2: classic UIP ✗

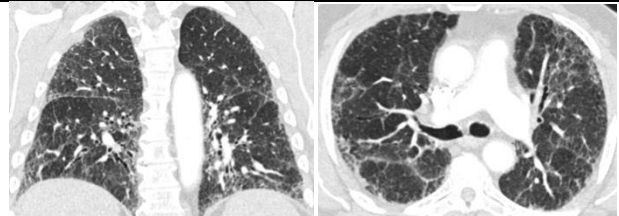

18. Computer score: -0.08 (atypical UIP) ✓

consensus: atypical UIP

fellow 1: atypical UIP ✓

fellow 2: atypical UIP ✓



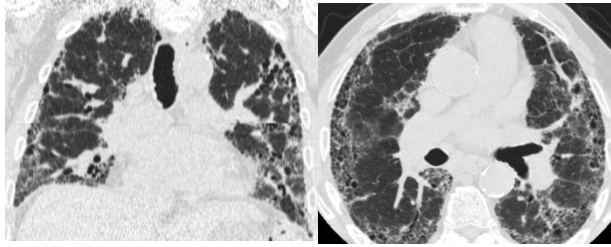

19. Computer score: 0.01 (classic UIP) ✓

consensus: classic UIP

fellow 1: classic UIP ✓

fellow 2: classic UIP ✓

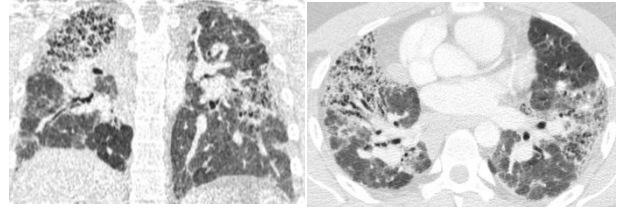

20. Computer score: 0.01 (classic UIP) ✗

consensus: atypical UIP

fellow 1: atypical UIP ✓

fellow 2: atypical UIP ✓

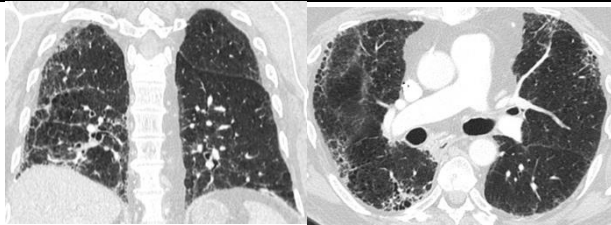

21. Computer score: 0.05 (classic UIP) ✓

consensus: classic UIP

fellow 1: classic UIP ✓

fellow 2: classic UIP ✓

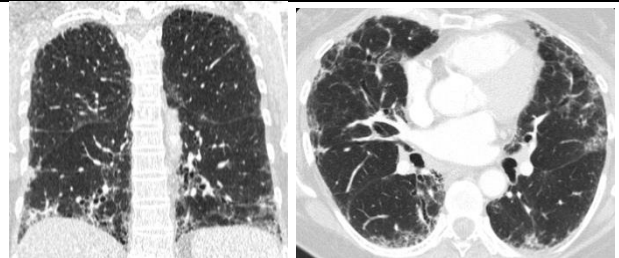

22. Computer score: 0.07 (classic UIP) ✓

consensus: classic UIP

fellow 1: classic UIP ✓

fellow 2: classic UIP ✓

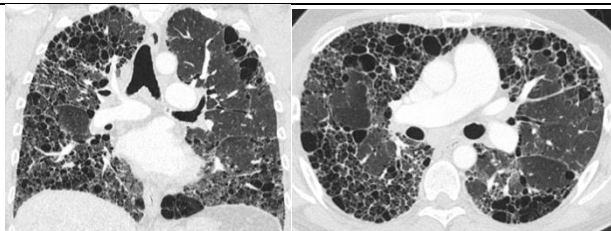

23. Computer score: 0.1 (classic UIP) ✓

consensus: classic UIP

fellow 1: classic UIP ✓

fellow 2: classic UIP ✓

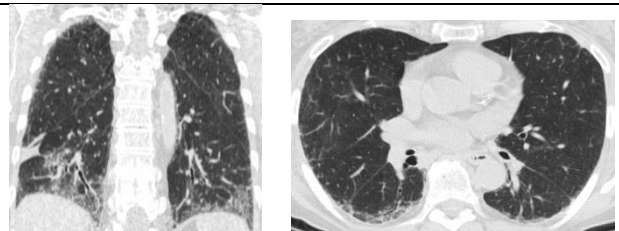

24. Computer score: 0.1 (classic UIP) ✗

consensus: atypical UIP

fellow 1: atypical UIP ✓

fellow 2: atypical UIP ✓

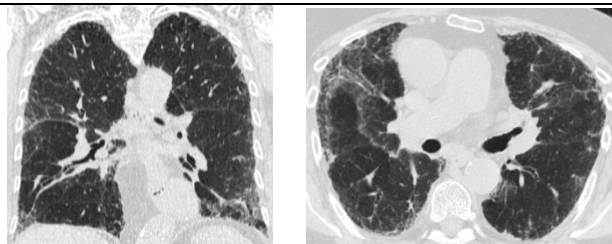

25. Computer score: 0.11 (classic UIP) ✓

consensus: classic UIP

fellow 1: atypical UIP ✗

fellow 2: atypical UIP ✗

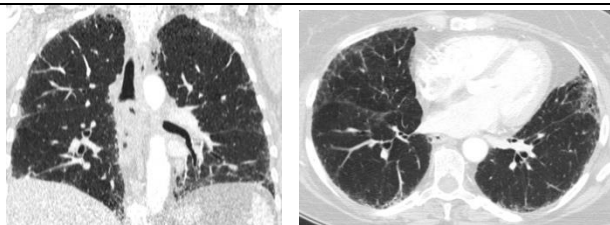

26. Computer score: 0.19 (classic UIP) ✓

consensus: classic UIP

fellow 1: atypical UIP ✗

fellow 2: atypical UIP ✗

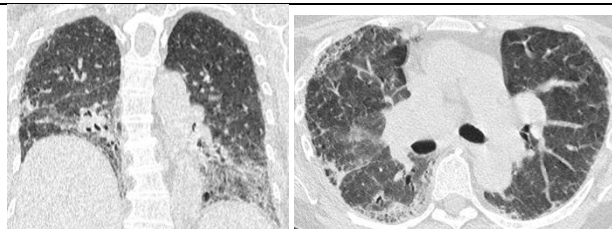

27. Computer score: 0.24 (classic UIP) ✗

consensus: atypical UIP

fellow 1: atypical UIP ✓

fellow 2: classic UIP ✗

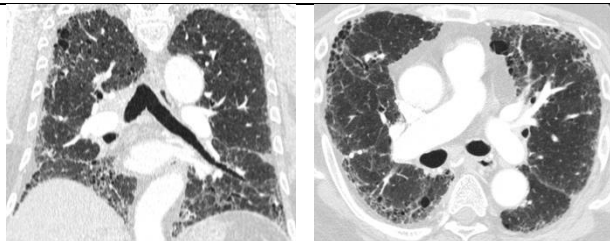

28. Computer score: 0.56 (classic UIP) ✓

consensus: classic UIP

fellow 1: classic UIP ✓

fellow 2: classic UIP ✓

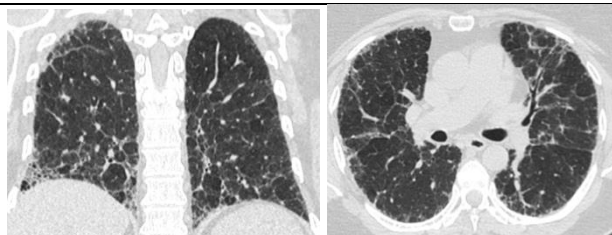

29. Computer score: 0.59 (classic UIP) ✓

consensus: classic UIP

fellow 1: classic UIP ✓

fellow 2: classic UIP ✓

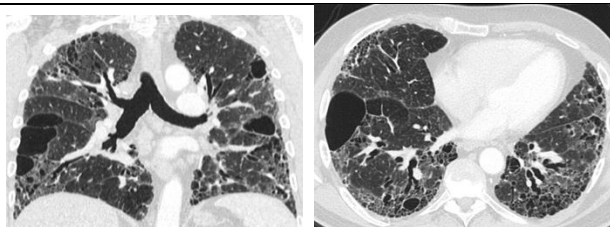

30. Computer score: 0.6 (classic UIP) ✓

consensus: classic UIP

fellow 1: classic UIP ✓

fellow 2: classic UIP ✓

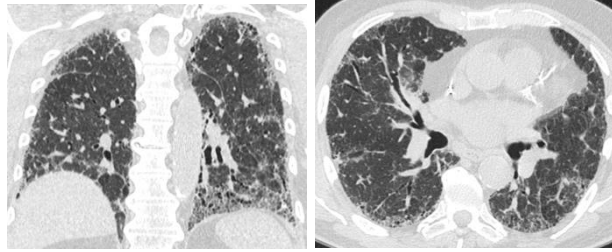

31. Computer score: 0.78 (classic UIP) ✓

consensus: classic UIP

fellow 1: classic UIP ✓

fellow 2: classic UIP ✓

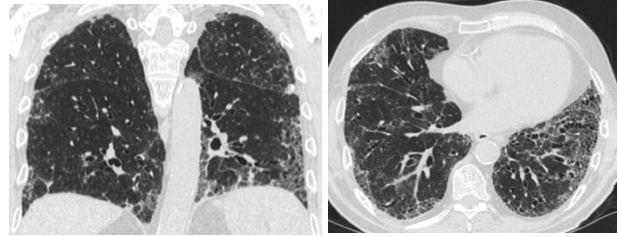

32. Computer score: 1.17 (classic UIP) ✓

consensus: classic UIP

fellow 1: classic UIP ✓

fellow 2: classic UIP ✓

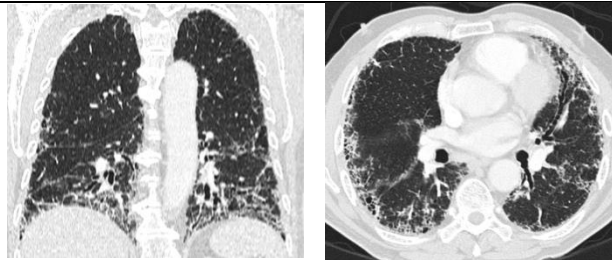

33. Computer score: 1.74 (classic UIP) ✓

consensus: classic UIP

fellow 1: classic UIP ✓

fellow 2: classic UIP ✓
